# Supplementary material for: Leveraging a Multi-Omics Strategy for Prioritizing Personalized Candidate Mutation-Driver Genes: A Proof-of-Concept Study
Source: PubMed Central journal article supplement (PMC4668376; doi:10.1038/srep17564), 2015-12-03
Supplement: srep17564-s1.pdf [file srep17564-s1.pdf]

Leveraging a Multi-Omics Strategy for Prioritizing Personalized Candidate Mutation-Driver  
Genes: A Proof-of-Concept Study

Keyue Ding<sup>1,4,\*</sup>, Songfeng Wu<sup>2,4</sup>, Wantao Ying<sup>2,4</sup>, Qi Pan<sup>1</sup>, Xiaoyuan Li<sup>3</sup>, Dachun Zhao<sup>4</sup>, Xianyu  
Li<sup>2</sup>, Qing Zhao<sup>2</sup>, Yunping Zhu<sup>2</sup>, Hong Ren<sup>1,\*</sup>, and Xiaohong Qian<sup>2,\*</sup>

1. Institute for Viral Hepatitis, Key Laboratory of Molecular Biology for Infectious Diseases, Ministry of Education of China; The Second Affiliated Hospital of Chongqing Medical University, Chongqing, P. R. China, 400010
2. State Key Laboratory of Proteomics, National Protein Science Beijing Center, Beijing Proteome Research Center, Beijing Institute of Radiation Medicine, Beijing, P.R. China, 102206
3. Department of Medical Oncology, Peking Union Medical College Hospital, Chinese Academy of Medical Sciences and Peking Union Medical College, Beijing, P. R. China, 100730
4. Department of Pathology, Peking Union Medical College Hospital, Chinese Academy of Medical Sciences and Peking Union Medical College, Beijing, P. R. China, 100730
5. These authors contributed equally to this work

\*, co-corresponding authors

## **Supplementary Materials**

### ***Library construction, exome capture, and whole exome sequencing (WES)***

The qualified genomic DNA sample was randomly fragmented into fragments with a base pair peak of 150 to 200bp, and then adapters were ligated to both ends of the resulting fragments. The adapter-ligated templates were purified by the AgencourtAMPure SPRI beads and fragments with insert size about 200bp were excised. Extracted DNA was amplified by ligation-mediated (LM-) PCR, purified, and hybridized to the SureSelect Biotinylated RNA Library (BAITS) for enrichment. Hybridized fragments were bound to the streptavidin beads whereas non-hybridized fragments were washed out after 24 hours. Captured LM-PCR products were subjected to Agilent 2100 Bioanalyzer to estimate the magnitude of enrichment. Each captured library was then loaded on Hiseq2000 platform. We performed high-throughput sequencing for each captured library independently to ensure that each sample met the desired average fold-coverage (i.e., at least 100×). Raw image files were processed by Illumina base calling Software (version 1.7) for base calling with default parameters and the sequences of each individual were generated as 90bp paired-end reads.

### ***RNA-Seq***

After the total RNA extraction and DNase I treatment, magnetic beads with Oligo (dT) are used to isolate mRNA from the total RNA. The mRNA was fragmented into short fragments mixed with the fragmentation buffer. Then, cDNA was synthesized using the mRNA fragments as templates. Short fragments were purified and resolved with EB buffer for end preparation and adenine addition. The short fragments were then connected with adapters. The suitable fragments were selected for PCR amplification. The quality of the sample library was assessed by Agilent 2100 Bioanalyzer and ABI StepOnePlus Real-Time PCR system. Finally, the cDNA library was sequenced using Illumina HiSeq™ 2000 and 90 bp paired-end sequences were generated.

### ***ddPCR validation for the nonsense mutation in MSH2***

The ddPCR reaction mixture consisted of 10 µl of a ddPCR master mix (Bio-Rad®), 0.8 µl of MSH2 primers mix (final Concentration: 900nM), 1µl MGB probes mix (Invitrogen®, final concentration: 500nM), and 2µl of sample solution in a final volume of 20 µl. MGB probes were obtained as a custom design from Life Technologies: 5'-FAM-AGGAGACGCTGTAGTT-MGB-3' (mutant allele), and 5'-VIC-AAGGAGACGCTGCAGT-MGB-3' (wild-type allele).

### ***Western blot of MSH2***

Frozen tissues were homogenized using the Tissue Homogenizer (Omni, American) in ice-cold RIPA lysis buffer (50mM Tris base, pH 7.4, 150mM NaCl, 1mM EDTA, 1% Triton X-100, 1% sodium deoxycholate, 0.1% SDS, 10nM PMSF) containing protease inhibitor cocktail tablets (Roche, Switzerland). Then, the tissues were lysed at 4°C for 30min in lysis buffer and the lysates were clarified by centrifugation at 15,000rpm at 4°C for 30min. Protein concentration was determined using the 2D Quantification Kit (Amersham Biosciences, Sweden). The protein samples (50ug in each well) were separated by SDS-PAGE and transferred to PVDF membrane. The membranes were blocked with 5% non-fat dry milk in TBS-T buffer (20mM Tris, pH 7.6, 100mM NaCl, 0.5% Tween-20) overnight at 4°C, followed by 3 hours of incubation with the primary antibody (Santa Cruz, American, 1:100 dilution) in TBS-T buffer containing 5% non-fat dry milk at room temperature. After washing three times with TBS-T buffer, the membranes were incubated with an HRP-conjugated goat anti-mouse IgG as the secondary antibody (MULTISciences, China, 1:5000 dilution) for 1 hour at room temperature. The membranes were then washed three times in TBS-T buffer and the reactions were visualized with the ECL detection system. All of the analyses were repeated at least three times.

### ***Protein extraction and in-solution digestion***

The liver tissues were resuspended in ice-cold lysis buffer (8 M urea, 20 mM Tris-HCl, pH 8.0, 1mM Na<sub>2</sub>VO<sub>3</sub>; 5mM NaF; 20mM DTT, 1% protease inhibitor cocktail). Acid cleaned glass beads were added and the tissue protein was extracted by collision for 30s with 70Hz energy. The protein extraction were moved to a new tube and further sonicated for 200 W × 1 s (working) × 2 s (resting) × 30 circles. The suspension was centrifuged at 12000 g for 15 min at 4 °C. Protein concentration was determined by a BCA assay.

For in-solution digestion, the tissue lysates were first reduced with 10mM DTT for 4h at 37 °C and alkylated with 40mM IAA in dark for 1 hour. Excess IAA was quenched by adding 20mM of DTT. The urea concentration in the sample solution was reduced to 1M with 50 mM NH<sub>4</sub>HCO<sub>3</sub>, and proteins were digested with trypsin (Promega, USA) overnight. The protein to enzyme ratio was 100:1 and protein digestion was stopped by adding formic acid at 0.1% final concentration.

### ***Serial peptide prefractionation by IEF and high pH reversed-phase chromatography***

Tryptic peptides were fractionated according to the manufacturer's protocol using Immobilin<sup>TM</sup> DryStrip, pH 3-10, 13cm (GE Healthcare) on an OFFGEL 3100 system (Agilent Technologies, USA). Twelve fractions were collected from the fractionator and then every three

continuous fractions were concatenated into one fraction, which resulted into 4 fractions from the IEF separation.

For the following high pH reversed-phase chromatography (bRP) separation, an L-3000 HPLC system (Rigol) by using a RP column (5  $\mu\text{m}$ , 300  $\text{\AA}$ , 250 mm  $\times$  4.6 mm I.D., Waters). Mobile phases A (2% acetonitrile in water (v/v), adjusted pH to 10.0 using  $\text{NH}_3\cdot\text{H}_2\text{O}$ ) and B (98% acetonitrile in water (v/v), adjusted pH to 10.0 using  $\text{NH}_3\cdot\text{H}_2\text{O}$ ) were used to develop a 40 min gradient. The flow rate was 0.7 mL/min and the column oven was set as 45°C. Eluent was collected every minute. Then the fractions were dried under vacuum (Thermo Savant). Before MS identification, the peptides were reconstituted in 0.1% (v/v) FA, 2% (v/v) acetonitrile in water, and pooled in a discontinuous mode into 24 (for the acid end IEF fraction) or 12 fractions (for the other three IEF fractions).

### ***Mass spectrometric analysis of peptide mixture***

Peptide mixture was measured on an Q-Exactive mass spectrometer (Thermo Fisher Scientific) equipped with an Easy-nLC nanoflow LC system (Thermo Fisher Scientific). Peptides were separated on a C18 column (3  $\mu\text{m}$ , 100  $\text{\AA}$ , 75  $\mu\text{m}$  ID  $\times$  10 cm). Mobile phase A consisted of 0.1% FA, 2% acetonitrile in water, and mobile phase B consisted of 0.1% FA, 98% acetonitrile in water. The solvent gradient was set as follows: 5%-8% B, 3 min; 8%-22% B, 30min; 22%-32% B, 5 min; 32%-90% B, 1 min; 90% B, 6 min. For the Q-Exactive part, the source was operated at 2.2 kV. For full MS survey scan, AGC target was 3e6, scan range was from m/z 300 to 1400 with the resolution of 70,000. The 75 most intense peaks with charge state 2 and above were selected for sequencing and fragmented in the ion trap by HCD with normalized collision energy of 27%. Exclude isotope item was on and dynamic exclusion time was set as 18s.

### ***Selective reaction monitoring (SRM) validation***

SRM transitions were calculated using Skyline software (<https://skyline.gs.washington.edu>) from the peptide amino acid sequence. At least the most intensity 8 fragment ions/each peptide were selected to setup MRM transitions. The MRM validation experiment was performed on Eksigent nanoLC-Ultra® 2D System and QTRAP 6500 system (AB SCIEX). And the MRM peaks were extracted and analyzed with Skyline software. The peptide with at least 8 MRM peaks was considered to be confirmed by MRM experiment.

For the mass spectrometric analysis, about 2 microgram peptide mixture was separated on an Eksigent nanoLC-Ultra® 2D System with a cHiPLC®-nanoflex system (Eksigent, USA) in trap elute mode. In each injection, the sample was desalted on a 200  $\mu\text{m}$   $\times$  6 mm trap chip and then

eluted onto a 200  $\mu\text{m}$  x 150 mm column chip for MS analysis. The media for both the trap and column chips were ChromXP C18-CL (3 $\mu\text{m}$ , 120 $\text{\AA}$ , Eksigent). Peptides were separated using a linear gradient formed by A (2% ACN, 0.1% FA) and B (98% ACN, 0.1% FA) from 7–35% of B over 75 minutes at a flow of 300nL/min.

The MS analysis was performed on a QTRAP® 6500 system (AB SCIEX). The optimal acquisition parameters were as follows: curtain gas (30), ionspray voltage (2300V), ion source gas (15), interface heater temperature (150°C), collision gas (High), declustering potential (80), entrance potential (10) and collision cell exit potential (15). The resolution parameters of the first and the third quadrupole were set as “unit”. The target ions were transmitted with a narrow window (0.7 Da). The dwell time was 20 ms for every transition.

### **MS database searching**

All raw files of mass spectra were converted into mzXML and MGF files using the msconvert module in the Trans-Proteomic Pipeline (TPP v4.5.2). The MS/MS peak lists were searched using the Mascot v2.3.2 local server against the database containing sequences of all human proteins from Refseq (71,448 proteins, release 64) and the mutated sequences constructed from WES and RNA-seq data. The target-decoy strategy was applied to maintain the FDR less than 1% at the peptide level. For the database searching using Mascot, the monoisotopic mass was used for both peptide and fragment ions, with fixed modification (Carbamidomethyl/carbamidomethylation, +57.0214 Da) on cysteine and variable modification (Oxidation, +15.9949 Da) on methionine. Tryptic cleavage after Lys or Arg was selected and up to 2 missed cleavage sites were allowed. The precursor and fragment ion mass tolerance 20 ppm and 0.05 Da.

A normalized label-free quantitation method based on the extracted ion chromatograms (XICs) was applied to all confidently identified peptides by the software of SILVER, and then the cross-search between the cancer and normal samples were performed to avoid the randomly missing in the identifications. We also used the measure of spectral count (SC)<sup>1</sup>, which are the total number of MS/MS spectra acquired for peptides from a given protein, to quantify protein abundance.

### **Reference**

1. Liu, H., Sadygov, R. G. & Yates, J. R. A model for random sampling and estimation of relative protein abundance in shotgun proteomics. *Anal. Chem.* **76**, 4193–4201 (2004).

## Supplementary figure legends

**Supplementary Figure S1.** Analysis of depth of coverage. a, the distribution of depth indicated that approximate 0.25% sequences were not covered by WES; and , the cumulative depth of coverage showed that >99% bases in the captured regions were covered at least eight times (depth  $\geq 8$ ). The distribution of depth of coverage did not differ among three sequenced tissues (ANOVA,  $P=0.84$ ).

**Supplementary Figure S2.** Functional classification of somatic mutations identified by WES (a) and RNA-centric variants in the combined RNA-seq data sets (b).

**Supplementary Figure S3.** Functional pathway analysis of 237 genes using IPA. (a) Pathway analysis indicated that 10 functions and diseases were related to liver. The number in the parenthesis is the number of genes for each disease and function. (b) In the network, genes related to liver disease and function; genes were highlighted if their tumor-mutated allele was translated.

**Supplementary Figure S4.** Validation of a mutated amino acid in *HNF1A* (chr12:121431992, NP\_000536, p.S247T) by SRM. (a) The mutated amino acid (T); and (b) The wild-type amino acid (S).

**Supplementary Figure S5.** A pipeline for identification of somatic mutations

**Supplementary Figure S6.** A pipeline for calling and filtering sequence variants in RNA-seq

## **Supplementary table legends**

Supplementary Table S1. Non-silent somatic mutations in DNA mismatch repair genes

Supplementary Table S2. Summary of WES reads in the studied patient

Supplementary Table S3. The total number of reads and mapped reads in two independent RNA-seq experiments (mRNA\_R1 and mRNA\_R2)

Supplementary Table S4. Summary of mass spectrometry in two independent proteome profiling experiments (Pro\_R1 and Pro\_R2)

Supplementary Table S5. Number of genes and somatic mutations expressed at the transcriptome level in two independent experiments of RNA-Seq and the merged data

Supplementary Table S6. Allelic fraction of somatic mutations in potential HCC driver genes

Supplementary Table S7. Allelic fraction of somatic mutations in subtle cancer driver genes

Supplementary Table S8. Allelic fraction of somatic mutations in the genes related to liver diseases and functions by Ingenuity Pathway Analysis (IPA)

Supplementary Table S9. Targeted peptides for selective reaction monitoring (SRM) detection

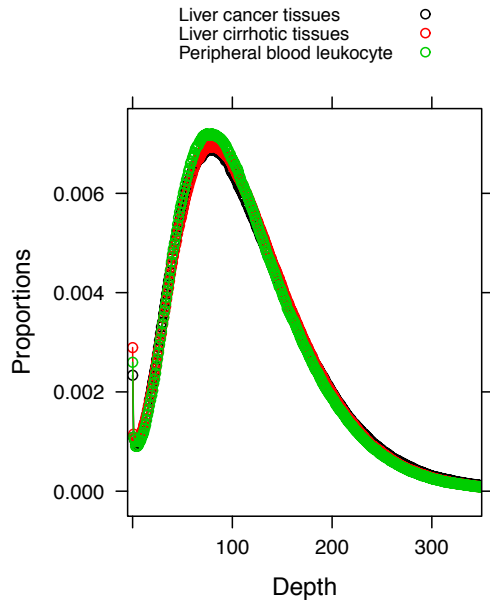

**a.**

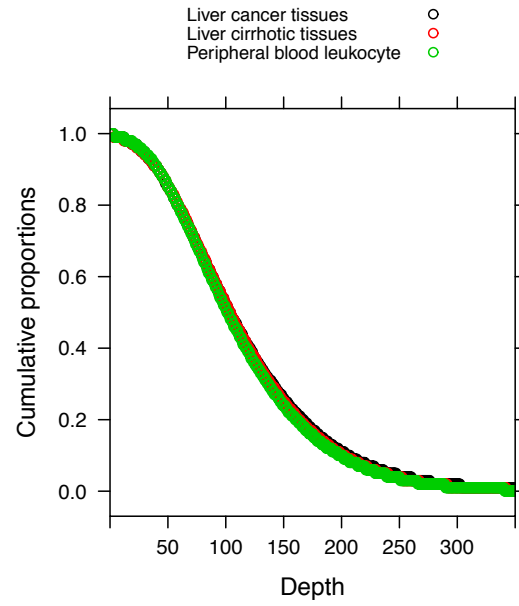

**b.**

**Supplementary Figure S1**



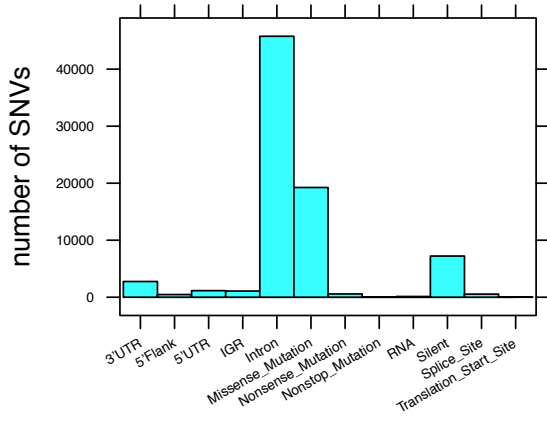

a. Somatic mutations (WES)

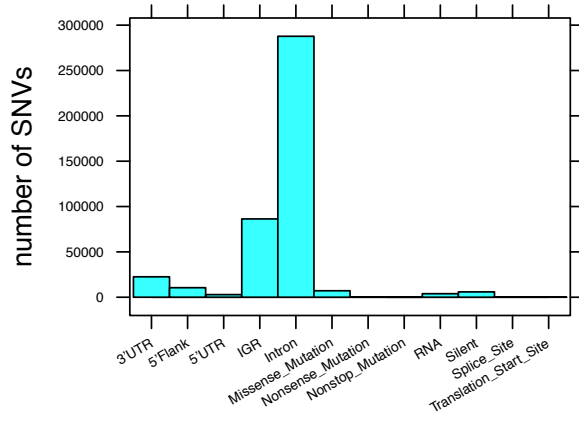

b. RNA-centric variants

**Supplementary Figure S2**

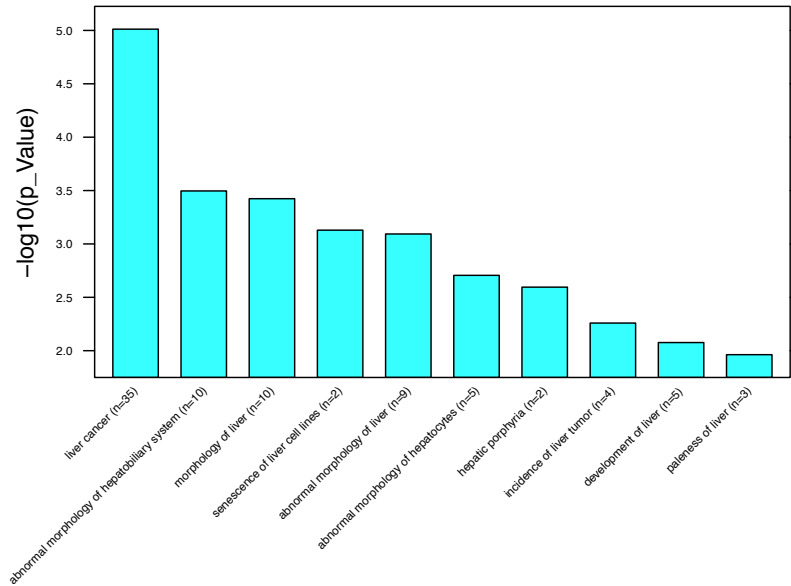

Diseases or functions annotation

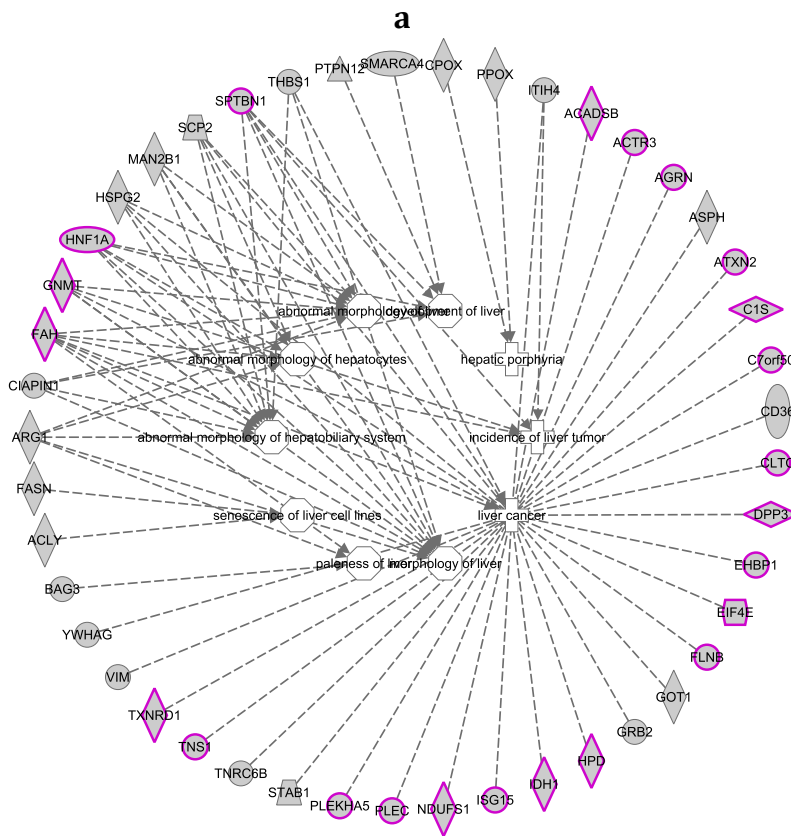

Supplementary Figure S3

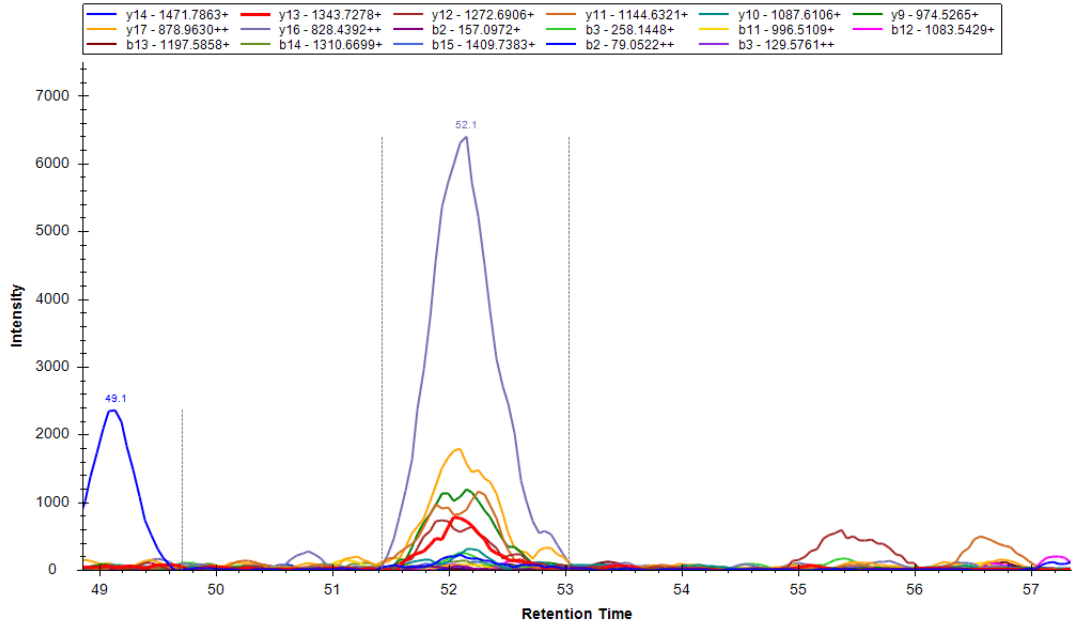

**a. Mutant allele**

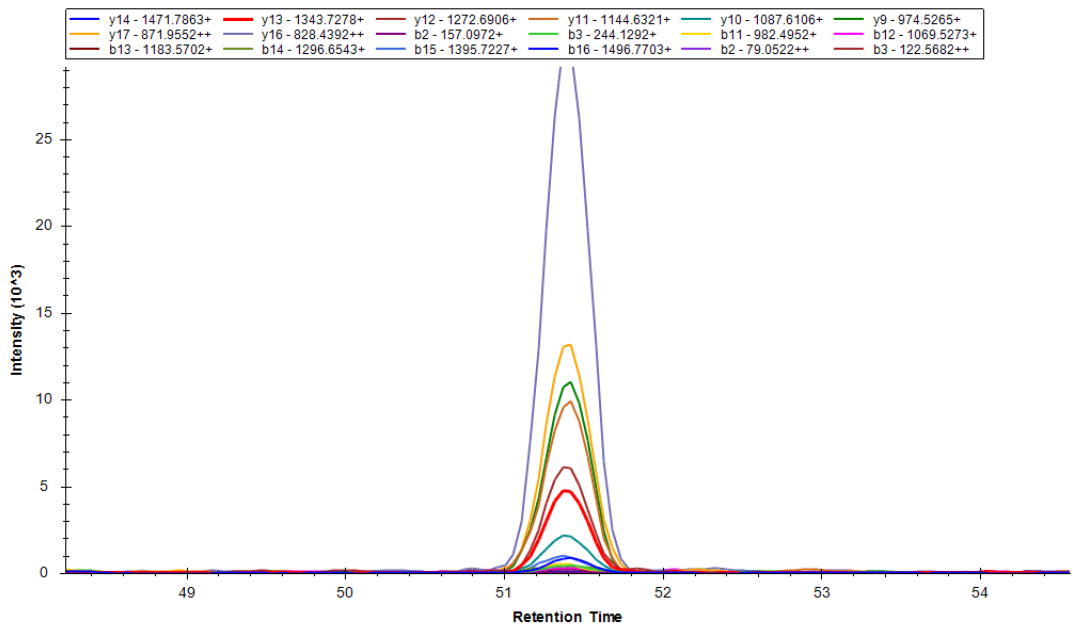

**b. Wild type allele**

**Supplementary Figure S4**

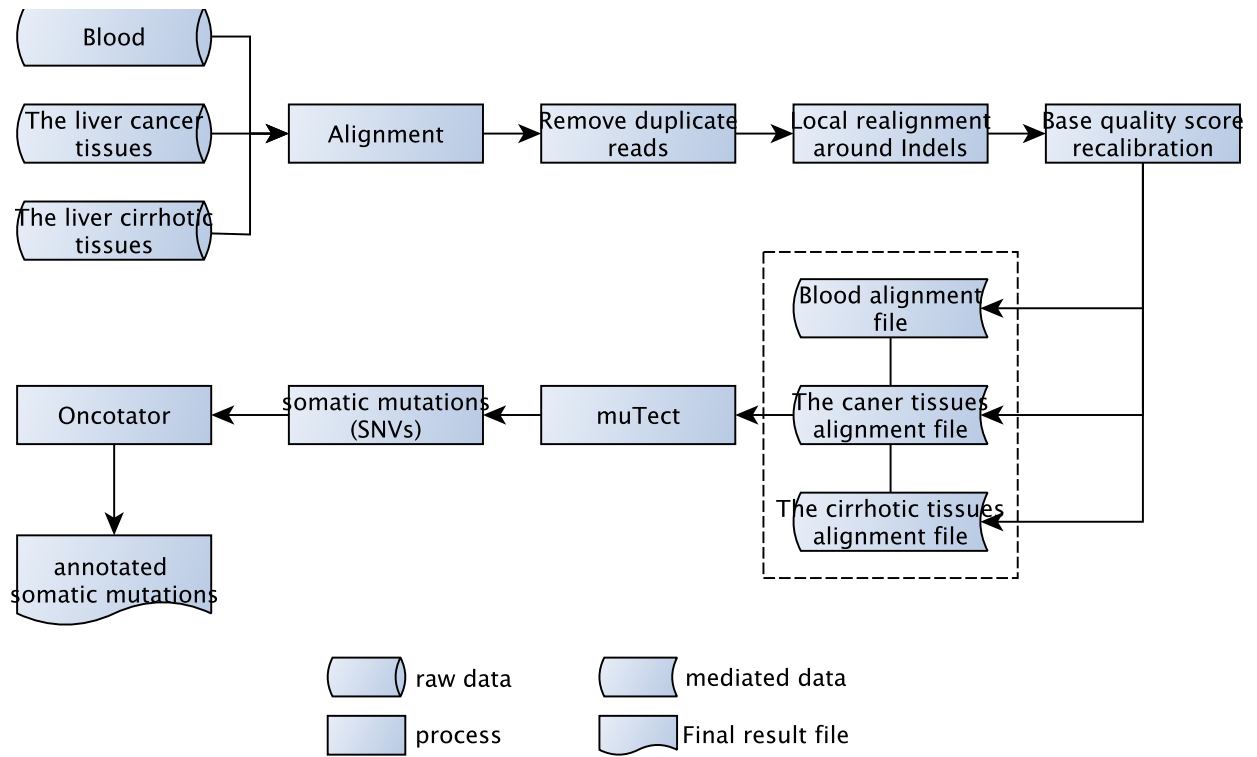

**Supplementary Figure S5**

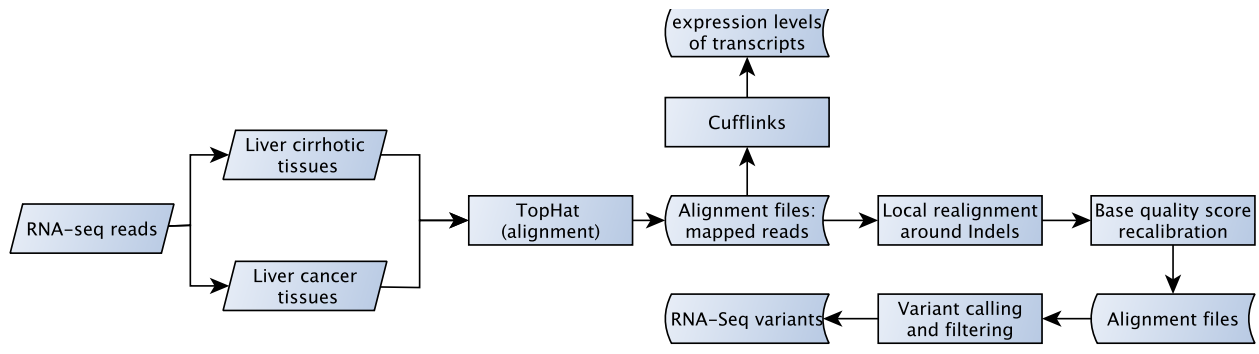

**Supplementary Figure S6**

**Supplementary Table S1.** Nonsilent somatic mutations identified in DNA mismatch repair genes in the studied patient

| Chr:Pos      | rs ID      | Accession    | AA<br>Change | Polyphen          | Symbol      |
|--------------|------------|--------------|--------------|-------------------|-------------|
| 2: 47630358  | rs63751099 | NP_000242    | Q10*         | Non-sense         | <i>MSH2</i> |
| 2: 47709981  | —          | NP_000242    | S900T        | Benign            | <i>MSH2</i> |
| 2: 48027584  | —          | NP_000170    | L821P        | Probably damaging | <i>MSH6</i> |
| 2: 48027758  | —          | NP_000170    | A879V        | Benign            | <i>MSH6</i> |
| 6: 31712037  | —          | NP_751898    | N203S        | Benign            | <i>MSH5</i> |
| 7: 6026747   | —          | NP_000526    | D550G        | Benign            | <i>PMS2</i> |
| 14: 75508356 | —          | NP_001035197 | S1143P       | Probably damaging | <i>MLH3</i> |
| 14: 75513519 | —          | NP_001035197 | F947S        | Benign            | <i>MLH3</i> |

*MSH2*, mutS homolog 2; *MSH6*, mutS homolog 6; *MSH5*, mutS homolog 5; *PMS2*, PMS2 postmeiotic segregation increased 2 (*S. cerevisiae*); *MLH3*, mutL homolog 3

**Supplementary Table S2.** Summary of WES reads in the studied patient

| Run                            | Total      | Mapped     | Rate   |
|--------------------------------|------------|------------|--------|
| <i>Liver cirrhotic tissues</i> |            |            |        |
| BJ22N_L4                       | 53,544,768 | 53,168,665 | 0.9930 |
| BJ22N_L5                       | 53,210,454 | 52,838,341 | 0.9930 |
| <i>Liver cancer tissues</i>    |            |            |        |
| BJ22T_L5                       | 56,115,372 | 55,763,527 | 0.9937 |
| BJ22T_L6                       | 55,616,690 | 55,269,482 | 0.9937 |
| Peripheral blood leukocyte     |            |            |        |
| BJ22P_L3                       | 52,515,626 | 52,264,300 | 0.9952 |
| BJ22P_L4                       | 52,456,168 | 52,203,965 | 0.9952 |

**Supplementary Table S3.** Number of reads and mapped reads in two independent RNA-Seq replicates

| Replicate | Run                        | Total reads | Mapped reads <sup>1</sup> | Rate   |
|-----------|----------------------------|-------------|---------------------------|--------|
| mRNA_R1   | The Liver cirrhotic tissue |             |                           |        |
|           | BJ22N_L1                   | 67,410,194  | 62,256,326                | 0.9235 |
|           | BJ22N_L6                   | 15,819,056  | 14,621,992                | 0.9243 |
|           | BJ22N_L7                   | 15,818,706  | 14,622,880                | 0.9244 |
|           | BJ22N_L8                   | 15,869,748  | 14,673,681                | 0.9246 |
|           | The Liver cancer tissue    |             |                           |        |
|           | BJ22T_L1                   | 65,140,898  | 58,148,829                | 0.8927 |
|           | BJ22T_L4                   | 47,772,662  | 42,721,439                | 0.8942 |
| mRNA_R2   | The Liver cirrhotic tissue |             |                           |        |
|           | BJ22R2N_L2                 | 131,662,802 | 121,059,668               | 0.9197 |
|           | The Liver cancer tissue    |             |                           |        |
|           | BJ22R2T_L2                 | 128,985,984 | 121,585,182               | 0.9426 |



**Supplementary Table S4.** Summary of mass spectrometry in two independent proteome profiling replicates

|                                       | Pro_R1  | Pro_R2  | Combined<br>(Pro_R1+Pro_R2) |
|---------------------------------------|---------|---------|-----------------------------|
| Mass spectra                          | 814,387 | 607,754 | 1,422,141                   |
| Unique peptides                       | 77,070  | 85,785  | 98,696                      |
| Non-redundant proteins (FDR<1%)       | 8,311   | 8,763   | 9,255                       |
| Peptide ion spanning mutation site    | 2,578   | 2,919   | 3,442                       |
| Number of mutations                   | 1,191   | 1,348   | 1,517                       |
| Peptide ion spanning somatic mutation | 922     | 1084    | 1,279                       |
| Number of somatic mutations           | 415     | 489     | 546                         |

**Supplementary Table S5.** Number of genes and tumor-mutated alleles expressed at the transcriptome levels in two independent RNA-Seq replicates and the combined data

| Patterns                    | mRNA_R1 |           |                | mRNA_R2 |           |                | Combined (R1 + R2) |           |                |
|-----------------------------|---------|-----------|----------------|---------|-----------|----------------|--------------------|-----------|----------------|
|                             | Genes   | Mutations | % <sup>3</sup> | Genes   | Mutations | % <sup>3</sup> | Genes              | Mutations | % <sup>3</sup> |
| w/o_expression <sup>1</sup> | 426     | 518       | 10.4           | 490     | 604       | 12.13          | 348                | 425       | 8.53           |
| w/o_covered <sup>2</sup>    | 1072    | 1302      | 26.14          | 850     | 1087      | 21.83          | 643                | 806       | 16.18          |
| Wild-type allele            | 1641    | 1891      | 37.97          | 1333    | 1508      | 30.28          | 1461               | 1688      | 33.90          |
| Both alleles                | 1047    | 1188      | 23.86          | 1460    | 1673      | 33.59          | 1683               | 1981      | 39.78          |
| Mutant-type allele          | 81      | 81        | 1.63           | 107     | 108       | 2.17           | 79                 | 80        | 1.61           |

<sup>1</sup>: Mutation sites in genes that was not expressed at the levels of transcriptome; w/o, without

<sup>2</sup>: Mutation sites were not covered by RNA-Seq

<sup>3</sup>: Percentage of somatic mutations

**Supplementary Table S6.** Allelic fraction of somatic mutations in potential HCC driver genes

| Symbol         | Chr_pos         | Allelic fraction |      |         | Site depth |     |         |
|----------------|-----------------|------------------|------|---------|------------|-----|---------|
|                |                 | DNA              | RNA  | Protein | DNA        | RNA | Protein |
| <i>ARID1A</i>  | chr1:27056157   | 0.29             | 0    | NA      | 193        | 41  | NA      |
| <i>CDKN2A</i>  | chr9:21971035   | 0.24             | 0.31 | NA      | 159        | 16  | NA      |
| <i>ARID2</i>   | chr12:46205331  | 0.10             | 0    | NA      | 50         | 8   | NA      |
| <i>BCL9</i>    | chr1:147091031  | 0.42             | NA   | NA      | 149        | NA  | NA      |
| <i>NFE2L2</i>  | chr2:178095533  | 0.43             | 0.23 | NA      | 151        | 190 | NA      |
| <i>ATM</i>     | chr11:108175552 | 0.10             | 0    | 0       | 62         | 16  | 1       |
| <i>SMARCA4</i> | chr19:11097111  | 0.43             | 0.41 | 0       | 97         | 80  | 3       |
| <i>TSC2</i>    | chr16:2125814   | 0.45             | 0.24 | NA      | 124        | 115 | NA      |
| <i>APC</i>     | chr5:112170817  | 0.50             | 0.54 | NA      | 44         | 26  | NA      |
| <i>JAK2</i>    | chr9:5044423    | 0.08             | 0    | NA      | 48         | 12  | NA      |
| <i>HNF1A</i>   | chr12:121431992 | 0.44             | 0.55 | 0.56    | 142        | 96  | 9       |

Shared is the prioritized personalized mutation-drivers in HCC

**Supplementary Table S7.** Allelic fraction of somatic mutations in subtle cancer driver genes

| Symbol          | Chr_pos        | Allelic fraction |      |         | Site depth |     |         |
|-----------------|----------------|------------------|------|---------|------------|-----|---------|
|                 |                | DNA              | RNA  | Protein | DNA        | RNA | Protein |
| <i>NOTCH2</i>   | chr1:120459074 | 0.04             | 0    | NA      | 139        | 245 | NA      |
| <i>NOTCH2</i>   | chr1:120468015 | 0.34             | 0.37 | NA      | 164        | 159 | NA      |
| <i>ARID1A</i>   | chr1:27056157  | 0.29             | 0    | NA      | 193        | 41  | NA      |
| <i>JAK1</i>     | chr1:65321212  | 0.43             | 0.41 | NA      | 56         | 249 | NA      |
| <i>FUBP1</i>    | chr1:78435648  | 0.06             | 0    | 0       | 99         | 73  | 4       |
| <i>NFE2L2</i>   | chr2:178095533 | 0.43             | 0.23 | NA      | 151        | 190 | NA      |
| <i>IDH1</i>     | chr2:209104698 | 0.35             | 0.4  | 0.22    | 62         | 249 | 9       |
| <i>DNMT3A</i>   | chr2:25470020  | 0.40             | 0    | NA      | 127        | 4   | NA      |
| <i>DNMT3A</i>   | chr2:25523022  | 0.43             | 0    | NA      | 88         | 4   | NA      |
| <i>ALK</i>      | chr2:29443601  | 0.54             | 0    | NA      | 56         | 2   | NA      |
| <i>MSH2</i>     | chr2:47630358  | 0.45             | NA   | NA      | 31         | NA  | NA      |
| <i>MSH2</i>     | chr2:47709981  | 0.17             | 0    | NA      | 47         | 3   | NA      |
| <i>MSH6</i>     | chr2:48027584  | 0.40             | 0.42 | NA      | 156        | 175 | NA      |
| <i>MSH6</i>     | chr2:48027758  | 0.43             | 0.37 | NA      | 190        | 38  | NA      |
| <i>SETD2</i>    | chr3:47158212  | 0.43             | 0.56 | NA      | 82         | 48  | NA      |
| <i>PBRM1</i>    | chr3:52610613  | 0.38             | 0.21 | NA      | 97         | 42  | NA      |
| <i>PBRM1</i>    | chr3:52661322  | 0.44             | 0.33 | NA      | 88         | 93  | NA      |
| <i>PBRM1</i>    | chr3:52662914  | 0.39             | 0.53 | NA      | 62         | 70  | NA      |
| <i>TET2</i>     | chr4:106157905 | 0.39             | 0.54 | NA      | 157        | 28  | NA      |
| <i>TET2</i>     | chr4:106158245 | 0.08             | 0    | NA      | 102        | 48  | NA      |
| <i>FBXW7</i>    | chr4:153332474 | 0.35             | 0.37 | NA      | 109        | 46  | NA      |
| <i>APC</i>      | chr5:112170817 | 0.50             | 0.54 | NA      | 44         | 26  | NA      |
| <i>ARID1B</i>   | chr6:157511254 | 0.04             | 0    | NA      | 226        | 74  | NA      |
| <i>HIST1H3B</i> | chr6:26032177  | 0.39             | 0.28 | 1       | 152        | 74  | 1       |

|               |                 |      |      |      |     |     |    |
|---------------|-----------------|------|------|------|-----|-----|----|
| <i>DAXX</i>   | chr6:33288743   | 0.42 | 0.4  | NA   | 80  | 86  | NA |
| <i>MET</i>    | chr7:116414938  | 0.50 | 0.49 | NA   | 12  | 205 | NA |
| <i>MLL3</i>   | chr7:151873282  | 0.44 | 0.55 | NA   | 163 | 44  | NA |
| <i>MLL3</i>   | chr7:151878023  | 0.49 | 0.41 | NA   | 198 | 39  | NA |
| <i>CARD11</i> | chr7:2956953    | 0.40 | NA   | NA   | 104 | NA  | NA |
| <i>NOTCH1</i> | chr9:139393409  | 0.37 | 0    | NA   | 278 | 15  | NA |
| <i>NOTCH1</i> | chr9:139407503  | 0.08 | 0    | NA   | 53  | 32  | NA |
| <i>CDKN2A</i> | chr9:21971035   | 0.24 | 0.31 | NA   | 159 | 16  | NA |
| <i>JAK2</i>   | chr9:5044423    | 0.08 | 0    | NA   | 48  | 12  | NA |
| <i>FGFR2</i>  | chr10:123325159 | 0.47 | 0.25 | NA   | 159 | 36  | NA |
| <i>ATM</i>    | chr11:108175552 | 0.10 | 0    | 0    | 62  | 16  | 1  |
| <i>MEN1</i>   | chr11:64572570  | 0.05 | 0    | NA   | 105 | 13  | NA |
| <i>MEN1</i>   | chr11:64575365  | 0.32 | 0.36 | NA   | 41  | 11  | NA |
| <i>MEN1</i>   | chr11:64575407  | 0.43 | 0.38 | NA   | 72  | 16  | NA |
| <i>HNF1A</i>  | chr12:121431992 | 0.44 | 0.55 | 0.56 | 142 | 96  | 9  |
| <i>ARID2</i>  | chr12:46205331  | 0.10 | 0    | NA   | 50  | 8   | NA |
| <i>MLL2</i>   | chr12:49420109  | 0.52 | 0.48 | NA   | 174 | 48  | NA |
| <i>MLL2</i>   | chr12:49431982  | 0.45 | 0.22 | NA   | 274 | 23  | NA |
| <i>MLL2</i>   | chr12:49437175  | 0.31 | 0.27 | NA   | 83  | 33  | NA |
| <i>MLL2</i>   | chr12:49437658  | 0.43 | 0.70 | NA   | 183 | 10  | NA |
| <i>MLL2</i>   | chr12:49445517  | 0.07 | 0    | NA   | 109 | 10  | NA |
| <i>CREBBP</i> | chr16:3777949   | 0.33 | 0.45 | NA   | 55  | 234 | NA |
| <i>CREBBP</i> | chr16:3781368   | 0.38 | 0.61 | NA   | 72  | 93  | 0  |
| <i>CREBBP</i> | chr16:3843416   | 0.44 | 0.46 | NA   | 45  | 69  | NA |
| <i>NF1</i>    | chr17:29509573  | 0.32 | 0.20 | NA   | 96  | 46  | NA |
| <i>BRCA1</i>  | chr17:41222980  | 0.38 | 0.33 | NA   | 179 | 9   | NA |
| <i>BRCA1</i>  | chr17:41244639  | 0.04 | 0    | NA   | 159 | 6   | NA |
| <i>SETBP1</i> | chr18:42531815  | 0.45 | 0.57 | NA   | 146 | 49  | NA |
| <i>SETBP1</i> | chr18:42532034  | 0.39 | 0.43 | NA   | 196 | 35  | NA |

|                |                |      |      |    |     |     |    |
|----------------|----------------|------|------|----|-----|-----|----|
| <i>SETBP1</i>  | chr18:42532966 | 0.43 | 0.47 | NA | 280 | 59  | NA |
| <i>DNMT1</i>   | chr19:10251847 | 0.25 | 0    | NA | 89  | 27  | NA |
| <i>SMARCA4</i> | chr19:11097111 | 0.43 | 0.41 | 0  | 97  | 80  | 3  |
| <i>STK11</i>   | chr19:1220467  | 0.44 | 0.43 | 0  | 167 | 217 | 1  |
| <i>STK11</i>   | chr19:1221957  | 0.31 | 0.50 | NA | 49  | 169 | NA |
| <i>PPP2R1A</i> | chr19:52714552 | 0.24 | 0.42 | NA | 46  | 250 | NA |
| <i>PPP2R1A</i> | chr19:52716344 | 0.38 | 0.41 | 0  | 232 | 162 | 3  |
| <i>ASXL1</i>   | chr20:30954198 | 0.35 | 0.38 | NA | 134 | 60  | NA |
| <i>RUNX1</i>   | chr21:36164740 | 0.42 | 0.23 | NA | 65  | 13  | NA |
| <i>EP300</i>   | chr22:41545885 | 0.37 | 0.41 | NA | 257 | 106 | NA |
| <i>EP300</i>   | chr22:41573290 | 0.35 | 0.46 | NA | 300 | 108 | NA |
| <i>STAG2</i>   | chrX:123197813 | 0.88 | 0.60 | 0  | 17  | 134 | 6  |
| <i>BCOR</i>    | chrX:39931640  | 0.80 | 1.00 | NA | 41  | 36  | NA |
| <i>KDM5C</i>   | chrX:53247528  | 0.83 | 0.93 | 1  | 41  | 28  | 1  |

Shared are the prioritized personalized mutation-drivers in HCC

**Supplementary Table S8.** Allelic fraction of somatic mutations in liver-related genes by Ingenuity Pathway Analysis (IPA)

| Symbol         | Chr_pos         | Allelic fraction |      |         | Site depth |     |         |
|----------------|-----------------|------------------|------|---------|------------|-----|---------|
|                |                 | DNA              | RNA  | Protein | DNA        | RNA | Protein |
| <i>PPOX</i>    | chr1:161140488  | 0.06             | 0    | 0       | 156        | 86  | 5       |
| <i>HSPG2</i>   | chr1:22199130   | 0.15             | 0    | NA      | 33         | 212 | NA      |
| <i>HSPG2</i>   | chr1:22214482   | 0.44             | 0    | 0       | 133        | 72  | 7       |
| <i>SCP2</i>    | chr1:53416522   | 0.38             | 0.57 | 0.10    | 68         | 223 | 42      |
| <i>ISG15</i>   | chr1:949490     | 0.42             | 0.52 | 0.87    | 81         | 250 | 15      |
| <i>AGRN</i>    | chr1:979308     | 0.49             | 0.36 | 0.12    | 59         | 33  | 8       |
| <i>GOT1</i>    | chr10:101163305 | 0.07             | 0    | 0       | 97         | 245 | 37      |
| <i>BAG3</i>    | chr10:121429385 | 0.08             | 0    | NA      | 234        | 166 | NA      |
| <i>BAG3</i>    | chr10:121429646 | 0.47             | 0.50 | 0.78    | 85         | 117 | 9       |
| <i>ACADSB</i>  | chr10:124813258 | 0.36             | 0.49 | 0.38    | 148        | 249 | 219     |
| <i>VIM</i>     | chr10:17271461  | 0.06             | 0    | 0       | 147        | 249 | 18      |
| <i>DPP3</i>    | chr11:66259041  | 0.49             | 0.41 | 0       | 139        | 69  | 23      |
| <i>TXNRD1</i>  | chr12:104712799 | 0.38             | 0.38 | 0.19    | 104        | 250 | 43      |
| <i>ATXN2</i>   | chr12:111951187 | 0.39             | 0.41 | 0.33    | 279        | 68  | 3       |
| <i>HNF1A</i>   | chr12:121431992 | 0.44             | 0.55 | 0.56    | 142        | 96  | 9       |
| <i>HPD</i>     | chr12:122294503 | 0.36             | 0.51 | 0.61    | 118        | 250 | 23      |
| <i>PLEKHA5</i> | chr12:19440438  | 0.43             | 0.59 | 0       | 72         | 68  | 7       |
| <i>PLEKHA5</i> | chr12:19512464  | 0.55             | 0.50 | 0       | 128        | 117 | 1       |
| <i>C1S</i>     | chr12:7177786   | 0.43             | 0.40 | 0.10    | 138        | 250 | 10      |
| <i>THBS1</i>   | chr15:39874936  | 0.46             | 0    | 0       | 57         | 26  | 8       |
| <i>FAH</i>     | chr15:80473495  | 0.50             | 0.51 | 0.57    | 40         | 247 | 21      |
| <i>CIAPIN1</i> | chr16:57468042  | 0.42             | 0.41 | 0.43    | 105        | 118 | 7       |
| <i>ACLY</i>    | chr17:40042483  | 0.38             | 0.42 | 0       | 60         | 192 | 4       |

|                |                |      |      |      |     |     |    |
|----------------|----------------|------|------|------|-----|-----|----|
| <i>CLTC</i>    | chr17:57762458 | 0.60 | 0.45 | 0.46 | 20  | 248 | 26 |
| <i>GRB2</i>    | chr17:73317853 | 0.06 | 0    | 0    | 83  | 149 | 5  |
| <i>FASN</i>    | chr17:80038651 | 0.15 | 0    | NA   | 106 | 246 | NA |
| <i>FASN</i>    | chr17:80041489 | 0.05 | 0    | 0    | 173 | 238 | 17 |
| <i>FASN</i>    | chr17:80043247 | 0.11 | 0    | NA   | 66  | 249 | NA |
| <i>FASN</i>    | chr17:80045666 | 0.28 | 0.66 | 0    | 57  | 249 | 11 |
| <i>FASN</i>    | chr17:80048931 | 0.41 | 0.75 | 0.29 | 292 | 193 | 14 |
| <i>SMARCA4</i> | chr19:11097111 | 0.43 | 0.41 | 0    | 97  | 80  | 3  |
| <i>MAN2B1</i>  | chr19:12758097 | 0.06 | 0    | 0    | 159 | 240 | 5  |
| <i>MAN2B1</i>  | chr19:12758339 | 0.07 | 0    | NA   | 92  | 242 | NA |
| <i>ACTR3</i>   | chr2:114691944 | 0.46 | 0.43 | 0.33 | 50  | 250 | 12 |
| <i>NDUFS1</i>  | chr2:207003277 | 0.45 | 0.53 | 0.40 | 11  | 250 | 25 |
| <i>NDUFS1</i>  | chr2:207007461 | 0.06 | 0    | 0    | 96  | 236 | 10 |
| <i>IDH1</i>    | chr2:209104698 | 0.35 | 0.40 | 0.22 | 62  | 249 | 9  |
| <i>TNS1</i>    | chr2:218683189 | 0.32 | 0.31 | NA   | 57  | 78  | NA |
| <i>TNS1</i>    | chr2:218755733 | 0.43 | 0.28 | NA   | 75  | 50  | NA |
| <i>TNS1</i>    | chr2:218758271 | 0.42 | 0.32 | 0    | 12  | 63  | 12 |
| <i>SPTBN1</i>  | chr2:54856880  | 0.47 | 0.33 | 0    | 119 | 250 | 6  |
| <i>SPTBN1</i>  | chr2:54877029  | 0.48 | 0.43 | 0.33 | 146 | 250 | 3  |
| <i>SPTBN1</i>  | chr2:54882240  | 0.44 | 0.39 | 0.27 | 77  | 250 | 11 |
| <i>EHBP1</i>   | chr2:62974547  | 0.50 | 0.51 | 0.50 | 50  | 102 | 4  |
| <i>EHBP1</i>   | chr2:63170978  | 0.32 | 0.51 | NA   | 95  | 86  | NA |
| <i>TNRC6B</i>  | chr22:40662093 | 0.05 | 0    | 0    | 113 | 52  | 3  |
| <i>STAB1</i>   | chr3:52535228  | 0.39 | 0    | 0    | 137 | 26  | 6  |
| <i>STAB1</i>   | chr3:52539153  | 0.19 | 0    | NA   | 151 | 60  | NA |
| <i>STAB1</i>   | chr3:52556377  | 0.14 | 0    | NA   | 181 | 45  | NA |
| <i>ITIH4</i>   | chr3:52860857  | 0.05 | 0    | 0    | 100 | 245 | 21 |
| <i>FLNB</i>    | chr3:58098028  | 0.30 | 0.42 | 0.42 | 64  | 200 | 12 |
| <i>CPOX</i>    | chr3:98304495  | 0.39 | 0.50 | 0    | 71  | 72  | 7  |



|                |                |      |      |      |     |     |     |
|----------------|----------------|------|------|------|-----|-----|-----|
| <i>EIF4E</i>   | chr4:99806088  | 0.36 | 0.45 | 0.17 | 14  | 240 | 6   |
| <i>ARG1</i>    | chr6:131904899 | 0.05 | 0    | 0    | 186 | 247 | 118 |
| <i>GNMT</i>    | chr6:42928545  | 0.47 | 0.38 | 0.43 | 43  | 201 | 7   |
| <i>C7orf50</i> | chr7:1049717   | 0.40 | 0.51 | 0.43 | 89  | 200 | 7   |
| <i>YWHAG</i>   | chr7:75959315  | 0.04 | 0    | 0    | 349 | 247 | 13  |
| <i>PTPN12</i>  | chr7:77210797  | 0.06 | 0    | NA   | 48  | 42  | NA  |
| <i>PTPN12</i>  | chr7:77221550  | 0.13 | 0.23 | 0    | 100 | 64  | 3   |
| <i>CD36</i>    | chr7:80302125  | 0.44 | 0    | 0    | 43  | 152 | 11  |
| <i>PLEC</i>    | chr8:144992371 | 0.58 | 0.39 | 0.15 | 33  | 84  | 40  |
| <i>PLEC</i>    | chr8:144993134 | 0.37 | 0.47 | 0    | 253 | 187 | 7   |
| <i>PLEC</i>    | chr8:144995359 | 0.41 | 0.52 | 0.30 | 135 | 79  | 10  |
| <i>PLEC</i>    | chr8:144998111 | 0.41 | 0.59 | 0    | 117 | 56  | 1   |
| <i>ASPH</i>    | chr8:62465634  | 0.37 | 0.47 | 0    | 115 | 237 | 14  |
| <i>ASPH</i>    | chr8:62479759  | 0.16 | 0    | NA   | 116 | 37  | NA  |

Shared are the prioritized personalized mutation-drivers in HCC

**Supplementary Table S9.** Targeted peptides for selective reaction monitoring (SRM) detection

| Chr_pos         | Symbol        | Accession   | Protein change | Synthesized peptides                                   |
|-----------------|---------------|-------------|----------------|--------------------------------------------------------|
| chr11:66259041  | <i>DPP3</i>   | NP_569710.2 | p.A292V        | AYAANSHQGQMLAQYIESFTQGSIEAHK                           |
| chr12:7177786   | <i>C1S</i>    | NP_001725.1 | p.G633D        | GMDSCCKGDSDGAFQVQDPNDK<br>GMDSCCKGDSGGAFQVQDPNDK       |
| chr8:144992371  | <i>PLEC</i>   | NP_000436.2 | p.L4010P       | RDDGTGQPLLPLSDAR<br>RDDGTGQLLLPLSDAR                   |
| chr1:949490     | <i>ISG15</i>  | NP_005092.1 | p.R44C         | IGVHAFQQCLAVHPSGVALQDR<br>IGVHAFQQR                    |
| chr12:104712799 | <i>TXNRD1</i> | NP_003321.3 | p.A280V        | VVYENVYGGQFIGPHR<br>VVYENAYGGQFIGPHR                   |
| chr12:121431992 | <i>HNF1A</i>  | NP_000536.5 | p.S247T        | GVTSPQAQGLGSNLVTEVR<br>GVSPPQAQGLGSNLVTEVR             |
| chr12:57350937  | <i>RDH16</i>  | NP_003699.3 | p.K104E        | DEGLWGLVNNAGISLPTAPNELLTK<br>DKGLWGLVNNAGISLPTAPNELLTK |
| chr15:80473495  | <i>FAH</i>    | NP_000128.1 | p.I392V        | FLLDGDEVIVTGYCQGDGYR<br>FLLDGDEVIITGYCQGDGYR           |
| chr17:57762458  | <i>CLTC</i>   | NP_004850.1 | p.N1492K       | TSIDAYDNFDK<br>TSIDAYDNFDNISLAQR                       |
| chr2:207003277  | <i>NDUFS1</i> | NP_004997.4 | p.Y442N        | VALIGSPVDLTYTNDHLGDSPK<br>VALIGSPVDLTYTYDHLGDSPK       |
| chr2:54877029   | <i>SPTBN1</i> | NP_003119.2 | p.K1827R       | RLPEELGR<br>KLPEELGR                                   |
| chr2:54882240   | <i>SPTBN1</i> | NP_003119.2 | p.N1952K       | DVSSVELLMNK<br>DVSSVELLMNNHQGIK                        |
| chr3:58098028   | <i>FLNB</i>   | NP_001448.2 | p.Y910H        | HTPTQQGNMQVLVITYGGDPIPK<br>YTPTQQGNMQVLVITYGGDPIPK     |
| chr8:144995359  | <i>PLEC</i>   | NP_000436.2 | p.T3014M       | CVEDPEMGLCLLPLTDK<br>CVEDPETGLCLLPLTDK                 |

Shared are the prioritized personalized mutation-drivers in HCC
